# Supplementary material
Source: publisher figshare collection journal article supplement (https://karger.figshare.com/ndownloader/files/15167384)
Supplement: Supplementary file 1 [file 15167384]

Box 1: Headings under which lymphoid and histiocytic neoplasms are described in the current classification.

- - Definition
  - ICD-O code
  - Synonyms
  - Epidemiology
  - Etiology
  - Localization
  - Clinical features
  - Imaging
  - Macroscopy and microscopy
  - Differential diagnosis
  - Immunophenotype
  - Postulated normal counterpart
  - Genetic profile
  - Genetic susceptibility
  - Prognosis and predictive factors
